# Supplementary material for: Genotype-phenotype correlation analysis of MYO15A variants in autosomal recessive non-syndromic hearing loss
Source: Springer Nature journal article supplement (doi:10.1186/s12881-019-0790-2), 2019-04-05

**Family139408**

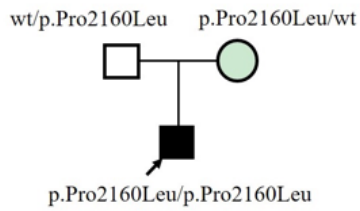

**Family1507361**

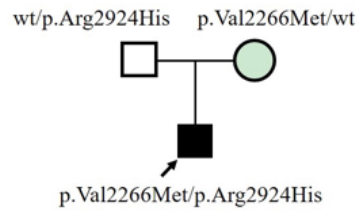

**Family1507382**

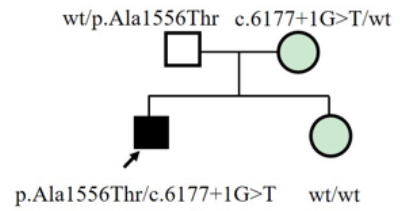

**Family1607486**

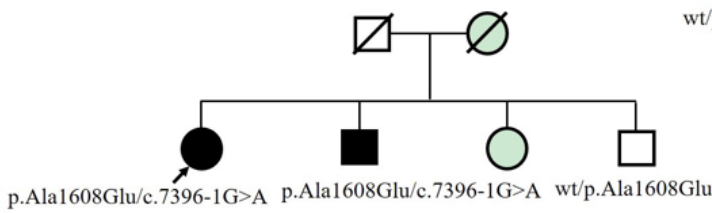

**Family1607551**

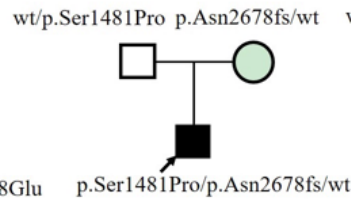

**Family1606852**

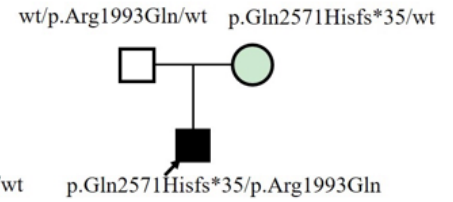

**Family1607107**

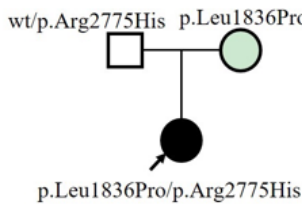

**Family1707735**

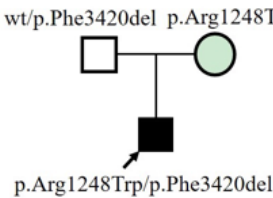

**Family1707757**

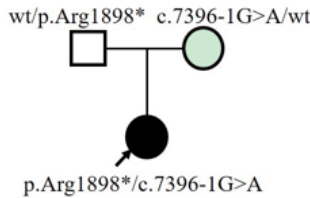

**Family170773**

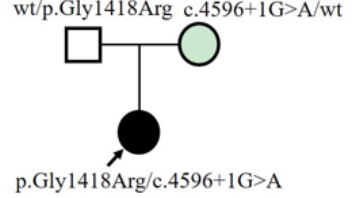

**Family1897966**

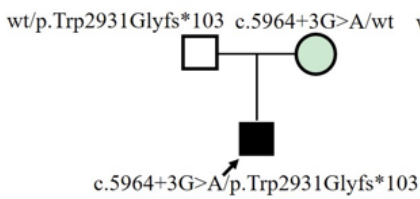

**Family1897999**

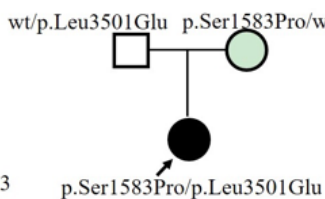

**Family1607545**

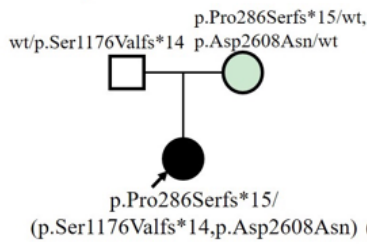

**Family1801980**

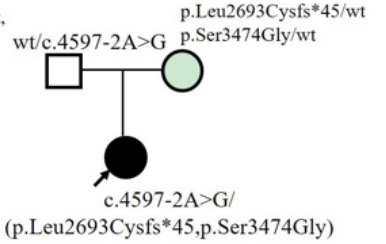

Supplement: MOESM2 [file 16619400]
